# Supplementary material for: Early life oxytocin treatment improves thermo-sensory reactivity and maternal behavior in neonates lacking the autism-associated gene Magel2
Source: PubMed Central journal article supplement (PMC9485246; doi:10.1038/s41386-022-01313-5), 2022-04-08
Supplement: 41386_2022_1313_MOESM1_ESM.pdf [file 41386_2022_1313_MOESM1_ESM.pdf]

1  
2  
3  
4  
5  
6  
7  
8  
9  
10  
11  
12  
13  
14  
15  
16  
17  
18  
19  
20  
21  
22  
23  
24  
25  
26  
27

## SUPPLEMENTARY DATA

### Supplemental methods

#### Corticosterone immunoassay

P2 mice were separated from their mother and placed on a heating pad for 5 min., then sacrificed and blood samples were quickly collected. Blood serum was separated by centrifugation (5,000 rpm, 20 min) and stored at -80°C. Serum corticosterone concentrations were measured with corticosterone ELISA kit (Enzo Life Sciences, Farmingdale, NY, USA) according to the manufacturer's instructions.

### Supplemental figures

#### Supplemental figure 1.

**A;C;E:** Before/after graphs illustrating the latency to the first call measured upon exposure at 25°C (red dots) followed by 17°C (blue dots) in WT and in *Magel2<sup>+/-p</sup>*. (A): At P1 : WT (25°C vs 17°C) :  $1.56 \pm 0.27$  ln+1s vs  $0.31 \pm 0.08$  ln+1s, n=16; p=0.002. *Magel2<sup>+/-p</sup>* (25°C vs 17°C) :  $1.74 \pm 0.33$  ln+1s vs  $0.97 \pm 0.36$  ln+1s, n=13; p=0.19. WT vs *Magel2<sup>+/-p</sup>* (25°C):  $1.56 \pm 0.27$  ln+1s, n=16 vs  $1.74 \pm 0.33$  ln+1s; n=13; p>0.99. WT vs *Magel2<sup>+/-p</sup>* (17°C):  $0.31 \pm 0.08$  ln+1s, n=16 vs  $0.97 \pm 0.36$  ln+1s; n=13; p=0.19. (C): At P3: WT (25°C vs 17°C) :  $2.08 \pm 0.32$  ln+1s vs  $1.19 \pm 0.27$  ln+1s; n=15, p=0.04. *Magel2<sup>+/-p</sup>* (25°C vs 17°C) :  $2.5 \pm 0.38$  ln+1s vs  $3.24 \pm 0.46$  ln+1s, n=16, p=0.07. WT vs *Magel2<sup>+/-p</sup>* (25°C):  $2.08 \pm 0.32$  ln+1s, n=15 vs  $2.5 \pm 0.38$  ln+1s; n=16, p=0.86. WT vs *Magel2<sup>+/-p</sup>* (17°C):  $1.19 \pm 0.27$  ln+1s, n=15 vs  $3.24 \pm 0.46$  ln+1s; n=16, p=0.0005. (E): At P6: WT (25°C vs 17°C) :  $2.97 \pm 0.39$  ln+1s vs  $2.56 \pm 0.29$  ln+1s, n=12, p=0.71. *Magel2<sup>+/-p</sup>* (25°C vs 17°C) :  $2.33 \pm 0.42$  ln+1s vs  $3.90 \pm 0.39$  ln+1s; n=12, p=0.0027. WT vs *Magel2<sup>+/-p</sup>* (25°C) :  $2.97 \pm 0.39$  ln+1s, n=12 vs  $2.33 \pm 0.42$  ln+1s; n=12, p=0.48. WT vs *Magel2<sup>+/-p</sup>* (17°C) :

28 2.56±0.29 ln+1s, n=12 vs 3.90±0.39 ln+1s; n=12, p=0.033. Repeated-measures  
29 (Temperature) Two-way ANOVA, Bonferroni's post-test.

30 **B;D;F:** Bar graphs comparing animals responsive rate of coolness-stimulated USV between  
31 WT and *Magel2<sup>+/-p</sup>* neonates from P1 to P6. At P1, WT: 87.5±8.5%, n=16 vs *Magel2<sup>+/-p</sup>*:  
32 58.82±12.3%; n=17; p<0.0001 (B). At P3, WT: 73.33±11.82%; n=15 vs *Magel2<sup>+/-p</sup>*: 20±10.69%,  
33 n=15; p<0.0001 (D). At P6, WT: 50±15.08%; n=12 vs *Magel2<sup>+/-p</sup>*: 7.69±7.69%; n=13; p<0.0001  
34 (F). Fisher's exact test.

35 **G-H:** Total number of calls over the age in WT (black lines) and *Magel2<sup>+/-p</sup>* (orange lines) upon  
36 ambient (25°C) (G) and cool exposure (17°C) (H). At P2, 17°C WT : 200.1±29.85; n=16 vs  
37 *Magel2<sup>+/-p</sup>* : 105.2±23.7; n=17; p=0.0238. At P3, 17°C: WT: 201.6±35.31; n=16 vs *Magel2<sup>+/-p</sup>* :  
38 48.24±10.49; n=17; p<0.0001. Repeated-measures (age) Two-way ANOVA, Bonferroni's  
39 post-test.

40 Data are presented as mean±SEM.

41

## 42 **Supplemental figure 2.**

43 **A:** Experimental procedure for corticosterone assay. After room habituation, neonates are  
44 separated from the dam, placed on a heating pad for 5 minutes and blood samples are  
45 collected just before the USV recording.

46 **B:** Corticosterone plasma levels in female and male of WT and *Magel2<sup>+/-p</sup>*. Males: WT:  
47 12,974±6,711 ng/ml; n=6 vs *Magel2<sup>+/-p</sup>*: 24,328±1,971 ng/ml; n=7, p=0.4740. Females: WT  
48 19,983±4,425 ng/ml; n=7 vs *Magel2<sup>+/-p</sup>*: 28,831±10,314 ng/ml; n=6, p=0.6723. Comparisons  
49 between conditions revealed no significant difference. Two-way ANOVA, Bonferroni's post-  
50 test.

51 Data are presented as mean±SEM.

52

## 53 **Supplemental Figure 3. Coolness reactivity in WT upon repeated or reverse temperature** 54 **exposures**

55 **A-C:** Before/after graphs illustrating the latency to the first call measured upon a repeated  
56 exposure at 25°C (red dots) in new independent WT-only cohorts at P2 (**B**) and P3 (**C**).  
57 Wilcoxon test.

58 **D-F:** Before/after graphs illustrating the latency to the first call measured upon exposure at  
59 17°C (blue dots) followed by 25°C (red dots) in new independent WT-only cohorts at P2 (**E**)  
60 and P3 (**F**). P2 WT (17°C vs 25°C):  $0.61 \pm 0.18 \ln+1 \text{ s}$  vs  $2.03 \pm 0.43 \ln+1 \text{ s}$ ;  $n=14$ ,  $p=0.0052$ ;  
61 P3 WT:  $0.25 \pm 0.18 \ln+1 \text{ s}$  vs  $1.40 \pm 1.05 \ln+1 \text{ s}$ ;  $n=8$ ,  $p=0.039$ . Wilcoxon test.

62 **G-H:** Bar graphs representing responsive rate of coolness-stimulated USV at P2 (**G**) and P3  
63 (**H**). P2 WT: 25°C-17°C:  $73.33 \pm 11.82 \%$ ,  $n=15$ ; 25°C-25°C:  $41.18 \pm 12.30 \%$ ,  $n=17$ ; 17°C-25°C:  
64  $85.71 \pm 9.70 \%$ ,  $n=14$ . P3 WT: 25°C-17°C:  $73.33 \pm 11.82 \%$ ,  $n=15$ ; 25°C-25°C:  $25.00 \pm 16.37 \%$ ,  
65  $n=8$ ; 17°C-25°C:  $66.67 \pm 16.67 \%$ ,  $n=9$ . Fisher's exact test.

66 Data are presented as mean $\pm$ SEM.

67

#### 68 **Supplemental figure 4.**

69 **A;C:** Before/after graphs represent the latency to the first call measured at 25°C (red squares)  
70 and 17°C (blue squares) in *Magel2*<sup>+/-p</sup> treated with OT (**A**):  $2.03 \pm 0.39 \ln+1 \text{ s}$  vs  $0.59 \pm 0.25 \ln+1 \text{ s}$ ;  
71  $n=13$ ;  $p=0.0049$ ), and AVP (**C**):  $1.44 \pm 0.39 \ln+1 \text{ s}$  vs  $0.28 \pm 0.16 \ln+1 \text{ s}$ ;  $n=8$ ;  $p=0.0156$ . Wilcoxon  
72 test.

73 **B;D:** Bar graphs showing animals responsive rate of coolness-stimulated USV in *Magel2*<sup>+/-p</sup>  
74 untreated or treated with OT (**B**):  $40 \pm 16.33 \%$ ;  $n=9$  vs  $76.92 \pm 12.16 \%$ ;  $n=13$ ;  $p<0.0001$ ), or  
75 AVP (**D**):  $75 \pm 16.37 \%$ ;  $n=8$ ;  $p<0.0001$ . Fisher's exact test.

76 **E:** Latency to the first call measured at 25°C (red dots) and 17°C (blue dots) in vehicle (Veh)  
77 or TGOT-treated WT. Veh (25°C vs 17°C) :  $1.48 \pm 0.26 \ln+1 \text{ s}$  vs  $0.55 \pm 0.13 \ln+1 \text{ s}$ ,  $n=15$ ;  
78  $p=0.0065$ . TGOT (25°C vs 17°C) :  $1.71 \pm 0.37 \ln+1 \text{ s}$  vs  $0.16 \pm 0.05 \ln+1 \text{ s}$ ,  $n=11$ ;  $p=0.0002$ . Veh  
79 vs TGOT (25°C):  $1.48 \pm 0.26 \ln+1 \text{ s}$ ,  $n=15$  vs  $1.71 \pm 0.37 \ln+1 \text{ s}$ ,  $n=11$ ;  $p>0.99$ . Veh vs TGOT  
80 (17°C):  $0.55 \pm 0.13 \ln+1 \text{ s}$ ,  $n=15$  vs  $0.16 \pm 0.05 \ln+1 \text{ s}$ ,  $n=11$ ;  $p=0.39$ . Repeated-measures  
81 (temperature) Two-way ANOVA, Bonferroni's post-test.

82 **F:** Responsive rate of coolness stimulated USV in untreated WT compared with TGOT-treated  
83 WT:  $73.33 \pm 11.82$  %; n=15 vs  $81.82 \pm 12.20$  %; n=11; p=0.2393. Fisher's exact test.

84 **G:** Total number of calls recorded during 5 minutes in *Magel2<sup>+/-p</sup>* treated with vehicle  
85 ( $41.3 \pm 16.48$ , n=10) and compared with OT ( $97.31 \pm 18.16$ %, n=13, p=0.45), or TGOT  
86 ( $198.50 \pm 23.45$  %, n=13, p=0.006), or AVP ( $205.30 \pm 44.03$  %, n=10, p=0.0035). Kruskal-Wallis  
87 test, Dunn's post-test.

88 **H:** Total number of calls in untreated WT compared with TGOT-treated WT at 17°C:  
89  $200.1 \pm 29.85$ ; n=16 vs  $255.5 \pm 39.92$ ; n=11; p=0.5039. Mann Whitney test.

90 Data are presented as mean $\pm$ SEM

91

92 **Supplemental figure 5. Extracellular signal-regulated kinase (ERK) signaling after cool**  
93 **exposure and oxytocin treatment**

94 **A-B:** Representative Western blots of cerebral Erk and phosphorylated Erk (P-Erk) issued from  
95 WT (A) and *Magel2<sup>+/-p</sup>* (B) treated with vehicle (Veh) and exposed to 25 or 17°C.

96 **C-D:** Western-blots quantification: WT+Veh (25°C):  $0.47 \pm 0.07$  vs WT+Veh (17°C):  $0.16 \pm 0.03$ ;  
97 n=6; p=0.0022 (C). *Magel2<sup>+/-p</sup>*+Veh (25°C):  $0.56 \pm 0.03$ ; n=7 vs *Magel2<sup>+/-p</sup>*+Veh (17°C):  
98  $0.58 \pm 0.07$ ; n=5; p=0.7424 (D); Mann Whitney test.

99 **E-F:** Representative Western blots of cerebral Erk and phosphorylated Erk (P-Erk) issued from  
100 WT (E) and *Magel2<sup>+/-p</sup>* (F) treated with OT and exposed to 25 or 17°C exposed to 25 or 17°C.

101 **G-H:** Western-blots quantification: WT+OT (25°C):  $1.32 \pm 0.11$ , n=5 vs WT+OT (17°C):  
102  $0.76 \pm 0.1$ ; n=4; p=0.0317 (G). *Magel2<sup>+/-p</sup>*+OT (25°C):  $1.08 \pm 0.09$ ; n=6 vs *Magel2<sup>+/-p</sup>*+OT (17°C):  
103  $0.62 \pm 0.12$ ; n=6; p=0.0087 (H); Mann Whitney tests.

104 Data are presented as mean $\pm$ SEM.

105

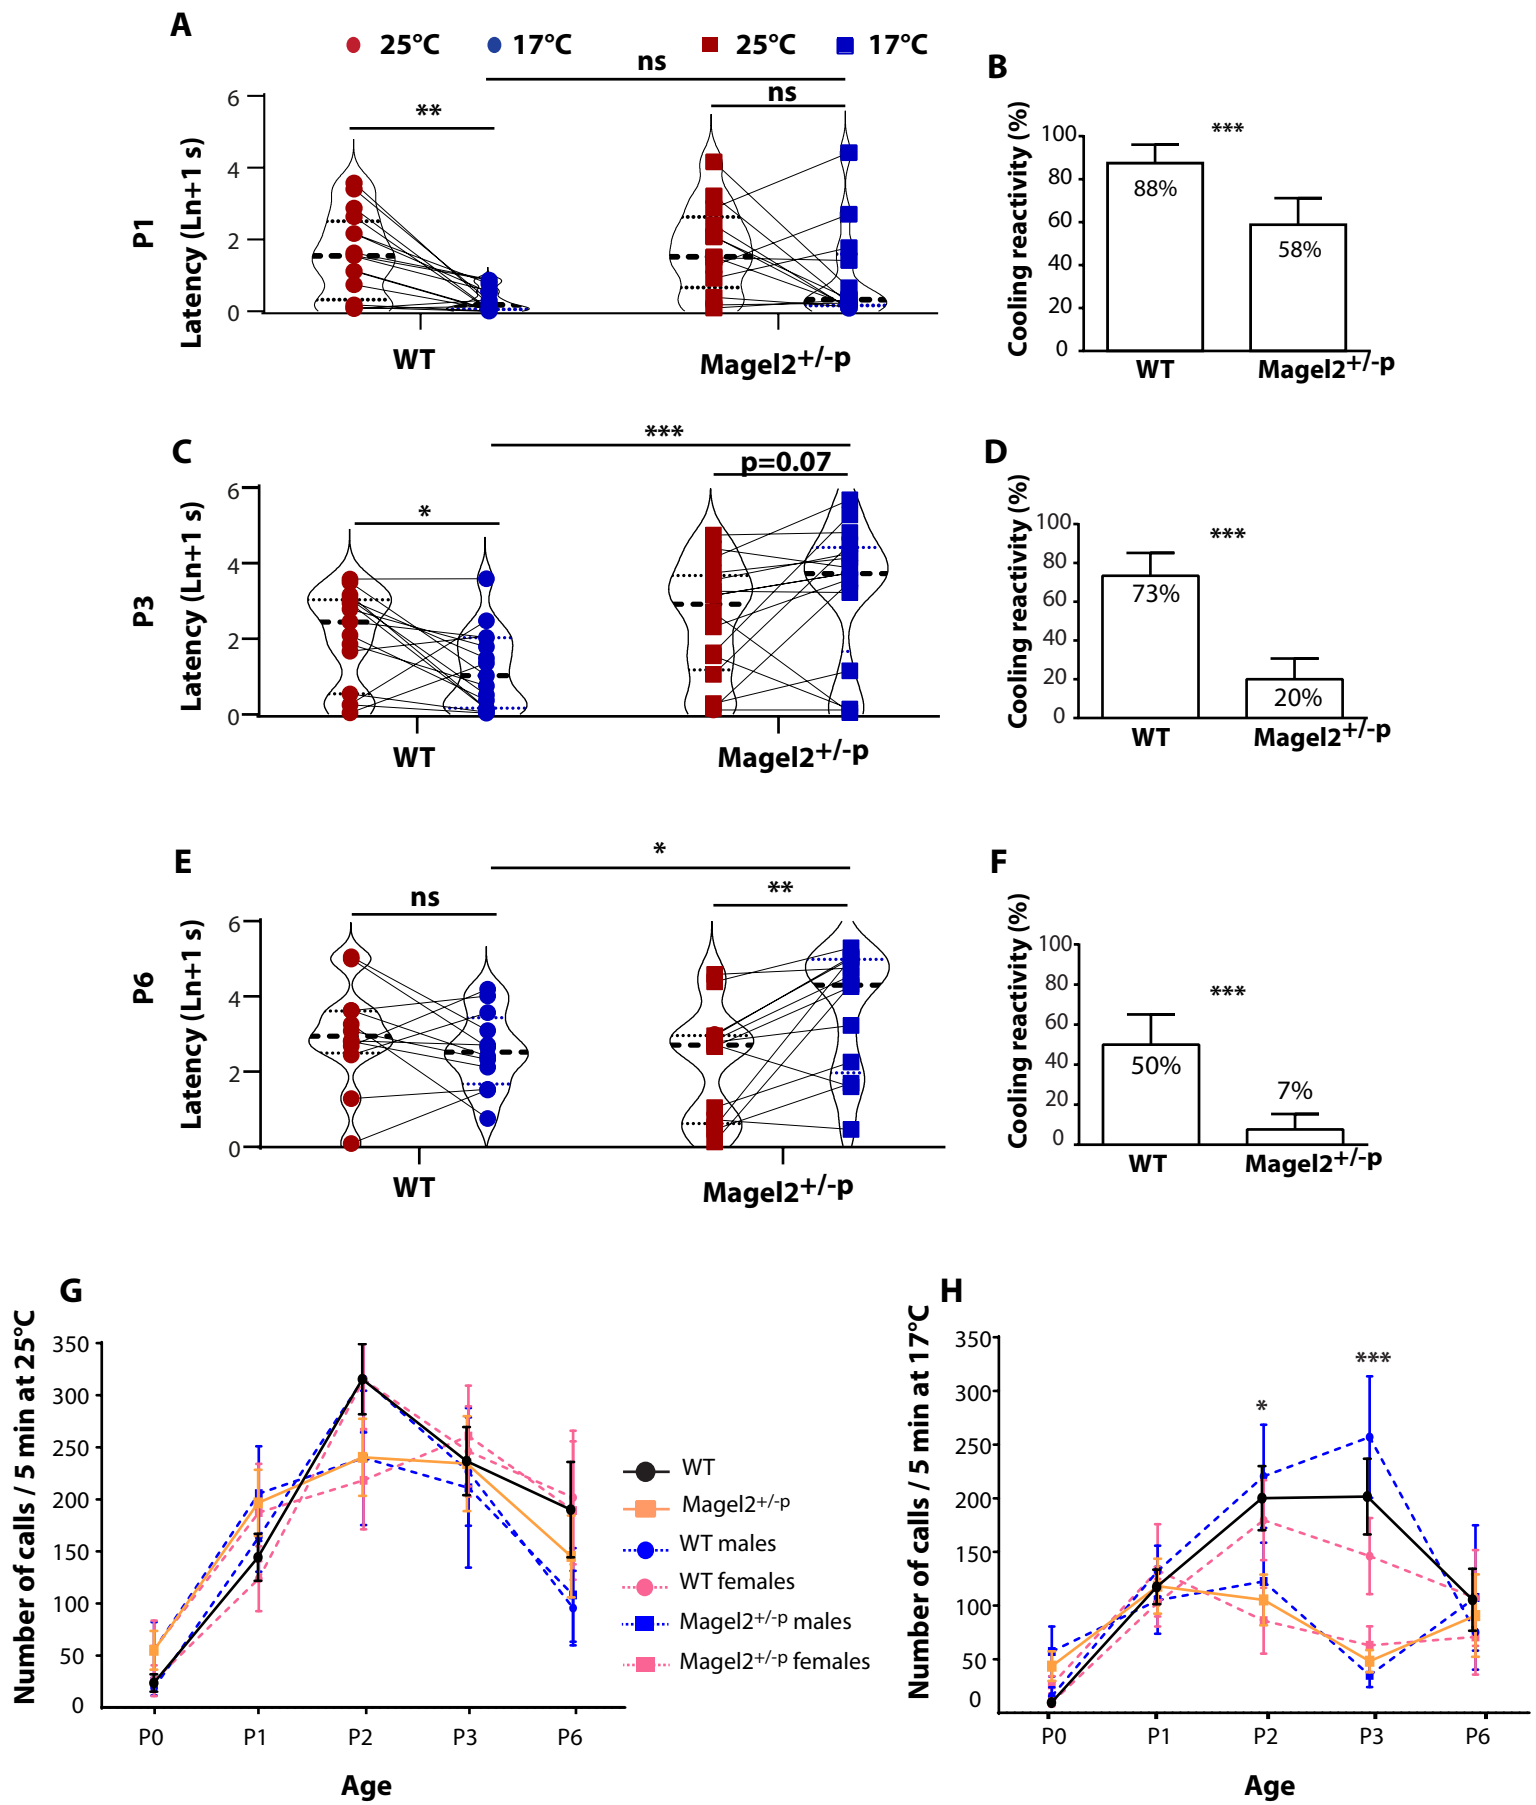

Supplemental Figure 1

**A**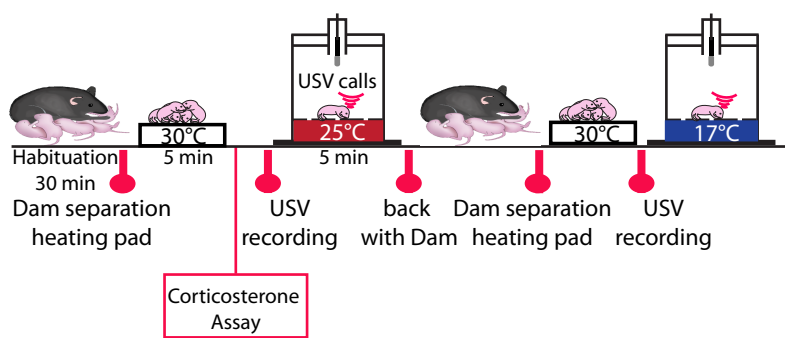**B**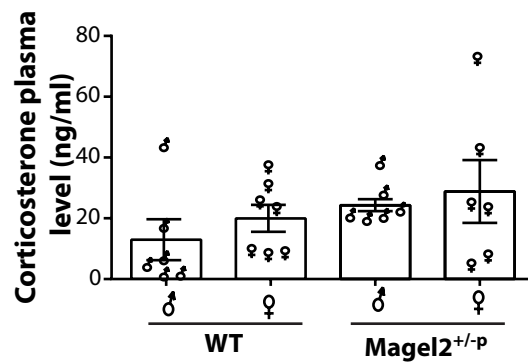**Supplemental Figure 2**

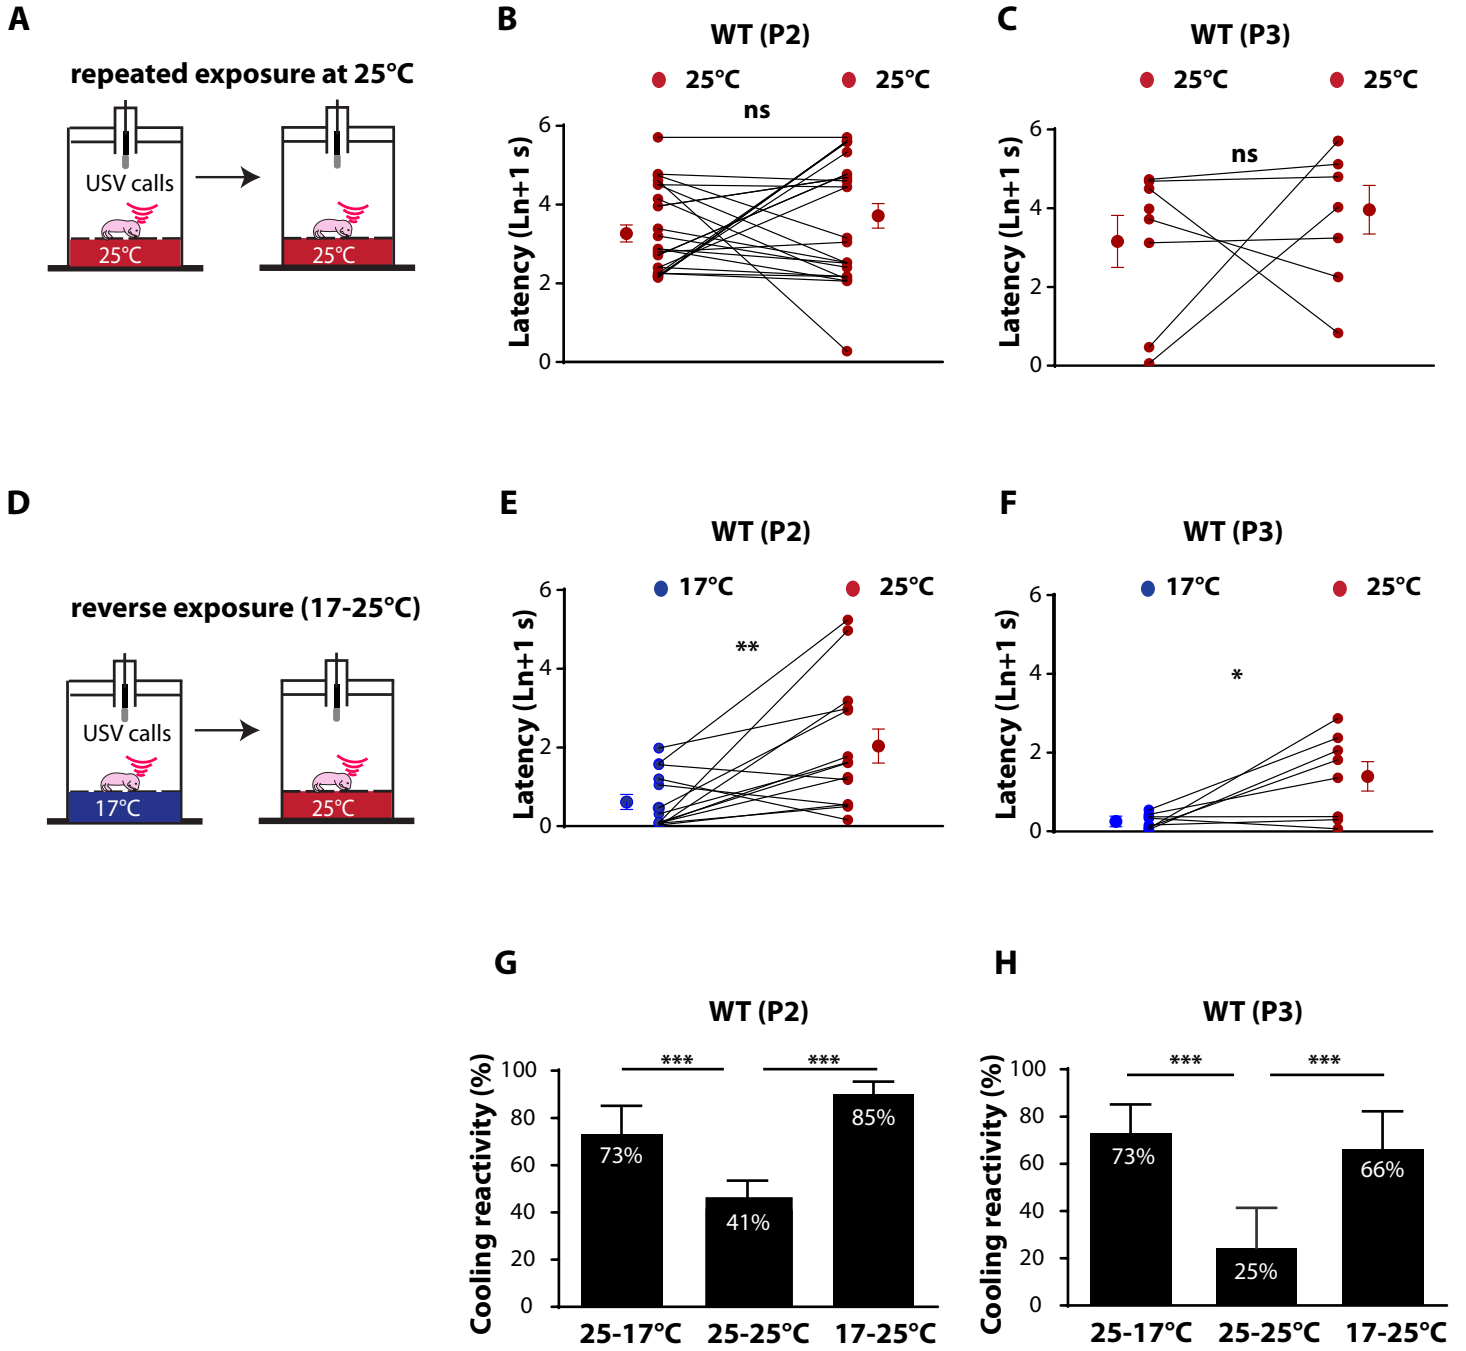

Supplemental Figure 3

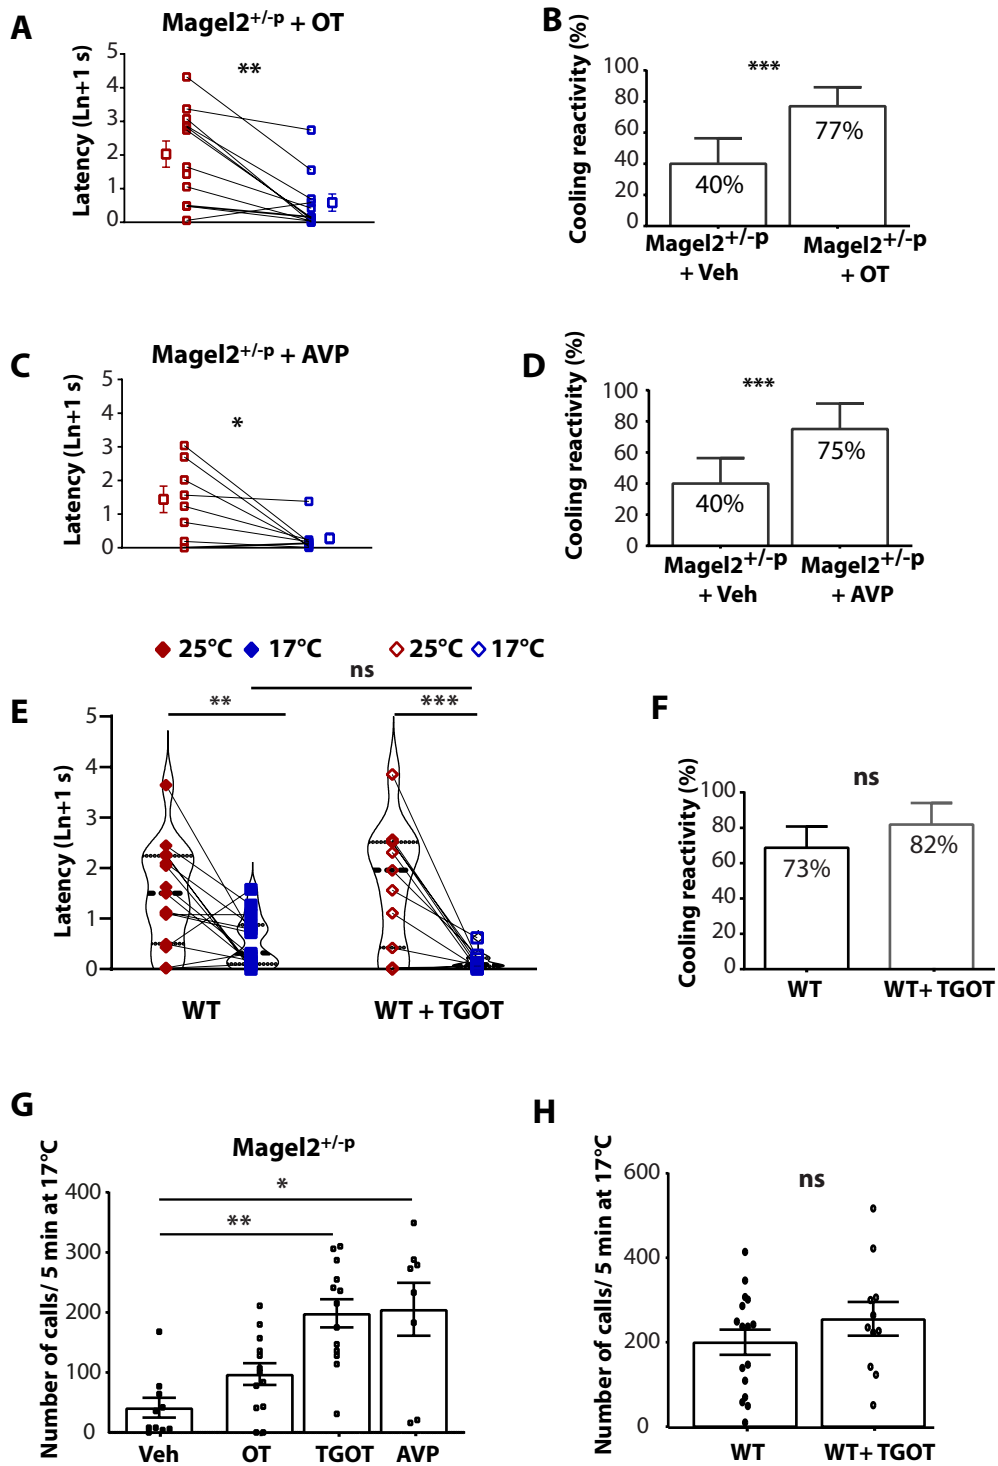

Supplemental Figure 4



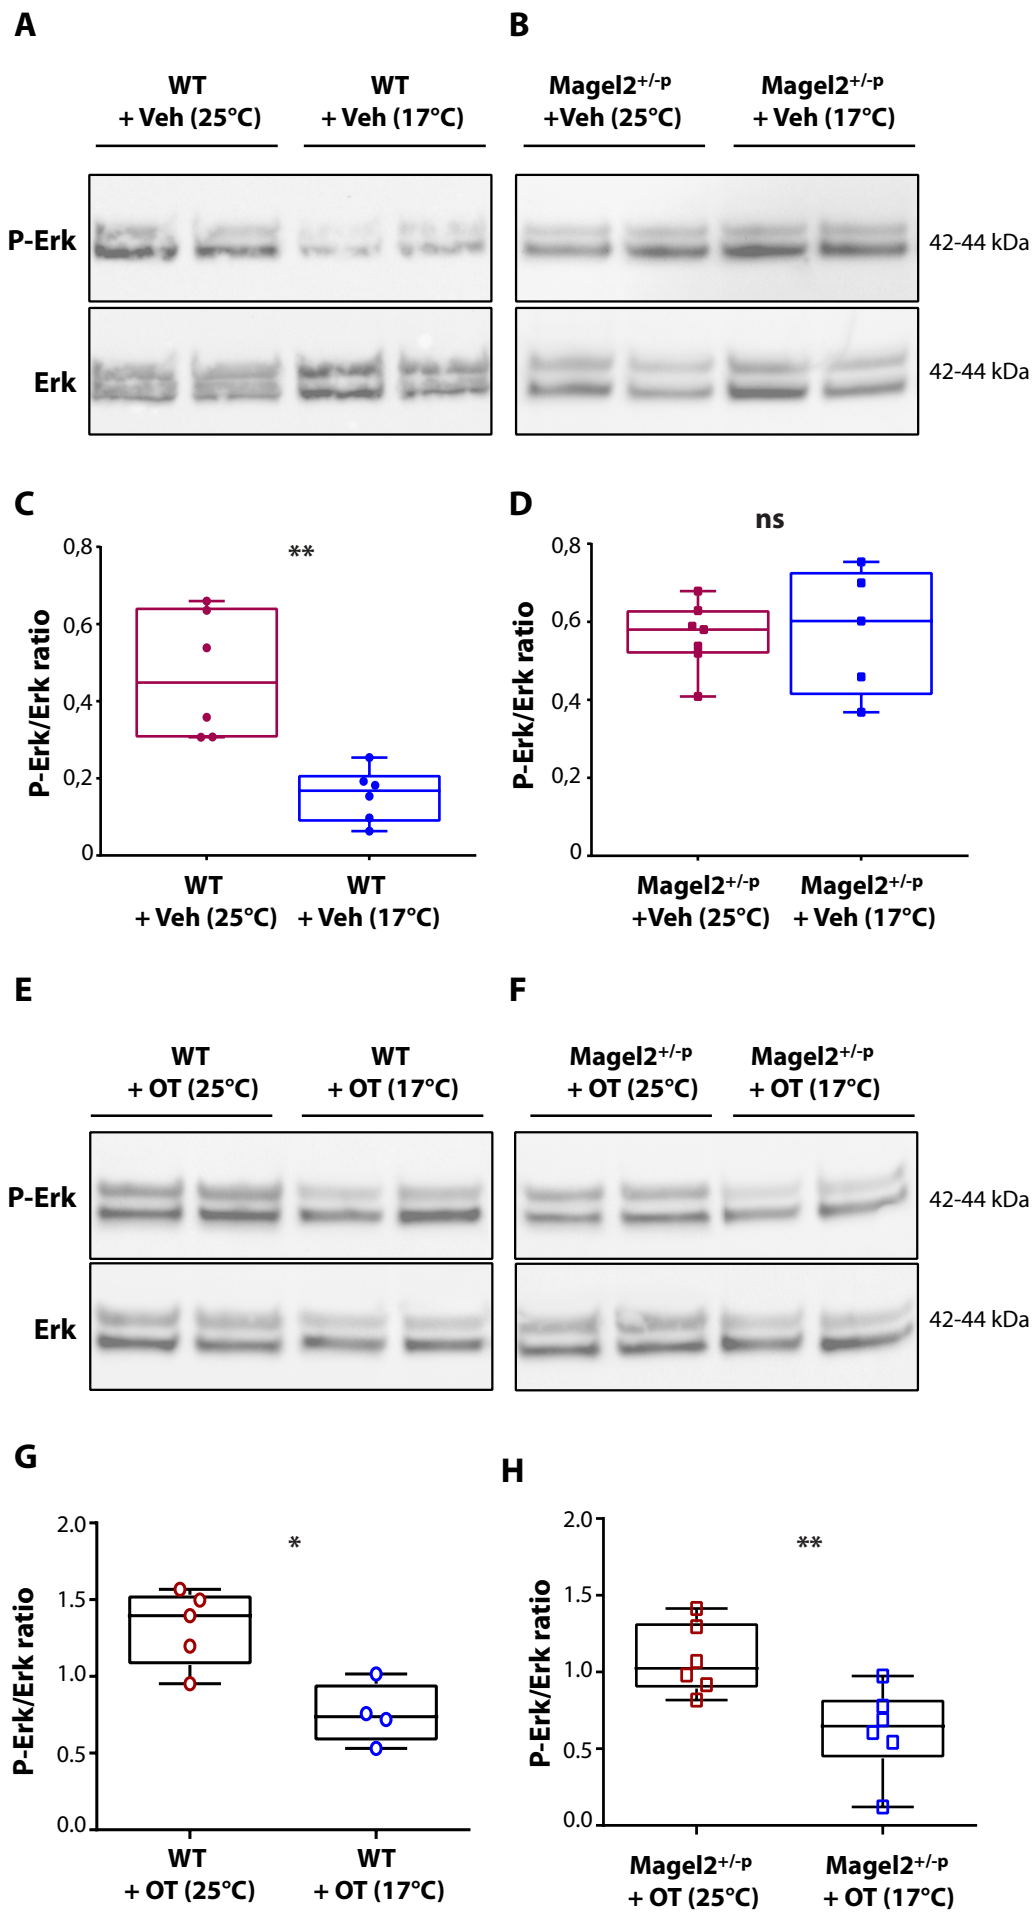

**Supplemental Figure 5**
